# Supplementary material
Source: PubMed Central journal article supplement (PMC5465602)
Supplement: NIHMS859995-supplement-supplement_1.pdf [file NIHMS859995-supplement-supplement_1.pdf]

Table 2. The association of IL-8 and TGF- $\beta$ 1 levels with the risk of RILT in 65 patients. Mean and standard deviation are obtained by calculating mean and standard deviation of long-transformed cytokine levels and ratios and then applying anti-log (exponentiation) to those values.

|                             | Mean $\pm$ sd (pg/ml) | OR 95% CI         | p     |
|-----------------------------|-----------------------|-------------------|-------|
| Pre IL-8                    | 11.1 $\pm$ 3.2        | 0.62 (0.39, 0.99) | 0.045 |
| 2w IL-8                     | 9.2 $\pm$ 3.5         | 0.84 (0.55, 1.31) | 0.45  |
| 4w IL-8                     | 11.8 $\pm$ 2.9        | 0.75 (0.45, 1.27) | 0.28  |
| IL-8 2w/pre ratio           | 0.8 $\pm$ 3.4         | 0.99 (0.97, 1.03) | 0.73  |
| IL-8 4w/pre ratio           | 1.1 $\pm$ 2.9         | 0.99 (0.95, 1.04) | 0.69  |
| Pre TGF- $\beta$ 1          | 4.6 $\pm$ 2.3         | 1.24 (0.62, 2.47) | 0.54  |
| 2w TGF- $\beta$ 1           | 3.4 $\pm$ 2.6         | 2.61 (1.23, 5.52) | 0.012 |
| 4w TGF- $\beta$ 1           | 3.3 $\pm$ 2.7         | 0.96 (0.80, 1.14) | 0.61  |
| TGF- $\beta$ 1 2w/pre ratio | 1.1 $\pm$ 1.0         | 2.30 (1.07, 4.97) | 0.034 |
| TGF- $\beta$ 1 4w/pre ratio | 1.0 $\pm$ 1.0         | 0.96 (0.54, 1.72) | 0.9   |

Footnote: IL-8= Interleukin-8, TGF- $\beta$ 1= Transforming growth factor bata1

Table e1. The association of the levels of 30 cytokines with grade $\geq$ 2 RILT in all 142 NSCLC patients in univariate analysis (cytokine levels are log-transformed).

|         | Pre Cytokine        |        | 2-week cytokine     |        | 4-week cytokine     |        | 2-week/pre cytokine |        | 4-week/pre cytokine |        |
|---------|---------------------|--------|---------------------|--------|---------------------|--------|---------------------|--------|---------------------|--------|
| egf     | 0.941 (0.745, 1.19) | 0.6045 | 0.959 (0.745, 1.23) | 0.7407 | 0.861 (0.654, 1.12) | 0.2757 | 0.923 (0.626, 1.03) | 0.5252 | 0.871 (0.569, 1)    | 0.3521 |
| eotaxin | 0.733 (0.409, 1.28) | 0.2822 | 0.639 (0.348, 1.14) | 0.1366 | 0.667 (0.34, 1.27)  | 0.2269 | 0.867 (0.346, 1.22) | 0.6443 | 1.03 (0.789, 1.26)  | 0.7428 |
| fractal | 1.03 (0.852, 1.25)  | 0.771  | 1.17 (0.963, 1.44)  | 0.1245 | 0.99 (0.81, 1.22)   | 0.9207 | 1 (0.951, 1.03)     | 0.9802 | 0.983 (0.91, 1.02)  | 0.4952 |
| gcsf    | 0.917 (0.743, 1.13) | 0.4196 | 0.902 (0.703, 1.16) | 0.4156 | 0.919 (0.71, 1.2)   | 0.5221 | 1 (0.997, 1.01)     | 0.3129 | 1 (0.992, 1)        | 0.9486 |
| gmcsf   | 0.943 (0.768, 1.15) | 0.5678 | 0.934 (0.756, 1.15) | 0.5174 | 0.942 (0.75, 1.18)  | 0.5997 | 0.991 (0.808, 1.06) | 0.8475 | 0.961 (0.734, 1.07) | 0.6382 |
| ifnr    | 1.1 (0.837, 1.42)   | 0.4969 | 1.07 (0.821, 1.38)  | 0.6138 | 1.08 (0.814, 1.43)  | 0.584  | 0.967 (0.738, 1.07) | 0.6562 | 0.938 (0.693, 1.05) | 0.5055 |
| il10    | 1.08 (0.905, 1.32)  | 0.4021 | 1.17 (0.971, 1.43)  | 0.1199 | 1.18 (0.964, 1.48)  | 0.1346 | 0.996 (NA, 1.01)    | 0.7181 | 1.03 (0.983, 1.08)  | 0.2318 |
| il12p40 | 1.09 (0.912, 1.31)  | 0.3324 | 1.1 (0.929, 1.31)   | 0.2518 | 1.05 (0.877, 1.26)  | 0.5684 | 1.01 (0.961, 1.06)  | 0.5375 | 0.958 (0.753, 1.02) | 0.5821 |
| il12p70 | 0.986 (0.786, 1.23) | 0.8993 | 1.03 (0.808, 1.3)   | 0.8047 | 1.03 (0.812, 1.31)  | 0.797  | 0.927 (0.566, 1.02) | 0.6084 | 0.87 (0.547, 1.08)  | 0.4187 |

---

|          |                     |               |                      |               |                      |               |                      |               |                      |        |
|----------|---------------------|---------------|----------------------|---------------|----------------------|---------------|----------------------|---------------|----------------------|--------|
| il13     | 1.12 (0.905, 1.4)   | 0.2854        | 1.1 (0.885, 1.36)    | 0.3898        | 1.03 (0.822, 1.28)   | 0.7994        | 0.837 (0.365, 1.01)  | 0.5621        | 0.835 (0.451, 0.979) | 0.384  |
| il15     | 1.07 (0.837, 1.4)   | 0.5877        | 1.19 (0.909, 1.62)   | 0.2244        | 1.23 (0.885, 1.77)   | 0.2427        | 0.998 (0.959, 1.02)  | 0.8793        | 0.997 (0.967, 1.01)  | 0.6949 |
| il17     | 0.956 (0.776, 1.19) | 0.6766        | 0.996 (0.81, 1.24)   | 0.9701        | 0.921 (0.739, 1.15)  | 0.4623        | 0.956 (0.657, 1.02)  | 0.6464        | 0.831 (0.408, 1)     | 0.4902 |
| il1a     | 0.95 (0.765, 1.17)  | 0.6351        | 0.966 (0.785, 1.18)  | 0.7392        | 0.836 (0.677, 1.02)  | 0.08554       | 0.988 (0.857, 1.03)  | 0.7035        | 0.921 (0.724, 1)     | 0.3278 |
| il1b     | 0.973 (0.805, 1.17) | 0.7728        | 0.994 (0.822, 1.2)   | 0.9528        | 1.01 (0.839, 1.22)   | 0.9208        | 0.915 (0.599, 1.09)  | 0.4825        | 0.977 (0.765, 1.03)  | 0.6778 |
| il1ra    | 1.07 (0.891, 1.29)  | 0.4832        | 1.15 (0.951, 1.4)    | 0.1593        | 1.01 (0.836, 1.23)   | 0.9013        | 0.997 (NA, 1.01)     | 0.7535        | 0.943 (0.799, 1.03)  | 0.3244 |
| il2      | 0.981 (0.788, 1.22) | 0.862         | 1.04 (0.838, 1.3)    | 0.7068        | 1.02 (0.822, 1.27)   | 0.8632        | 0.998 (NA, 1)        | 0.7421        | 0.998 (0.974, 1.01)  | 0.7971 |
| il4      | 0.948 (0.792, 1.13) | 0.5501        | 0.998 (0.831, 1.19)  | 0.9806        | 0.945 (0.78, 1.14)   | 0.5552        | 1.02 (0.945, 1.08)   | 0.5743        | 0.917 (0.657, 0.992) | 0.4308 |
| il5      | 1 (0.826, 1.24)     | 0.9788        | 1.01 (0.831, 1.25)   | 0.9274        | 1.03 (0.856, 1.28)   | 0.737         | 0.991 (NA, 1)        | 0.6915        | 1 (NA, 1)            | 0.8356 |
| il6      | 0.946 (0.776, 1.16) | 0.5896        | 0.971 (0.796, 1.2)   | 0.7793        | 1.02 (0.836, 1.27)   | 0.8236        | 0.995 (0.953, 1.01)  | 0.6706        | 0.992 (0.936, 1.01)  | 0.5997 |
| il7      | 1.12 (0.844, 1.48)  | 0.4224        | 1.27 (0.96, 1.68)    | 0.09392       | 1.17 (0.875, 1.57)   | 0.2845        | 1.07 (0.885, 1.26)   | 0.4229        | 1.02 (0.9, 1.13)     | 0.6714 |
| il8      | 0.525 (0.343, 0.77) | <b>0.0015</b> | 0.661 (0.459, 0.936) | <b>0.0211</b> | 0.575 (0.369, 0.867) | <b>0.0102</b> | 0.996 (NA, 1.02)     | 0.788         | 0.992 (NA, 1.02)     | 0.7399 |
| ip10     | 0.949 (0.747, 1.25) | 0.6792        | 0.9 (0.71, 1.17)     | 0.3981        | 0.895 (0.714, 1.14)  | 0.3437        | 0.592 (0.236, 0.945) | 0.2047        | 0.907 (0.619, 1.03)  | 0.5261 |
| mcp1     | 0.851 (0.614, 1.22) | 0.3381        | 0.949 (0.72, 1.31)   | 0.7255        | 0.908 (0.661, 1.31)  | 0.5664        | 0.981 (0.649, 1.28)  | 0.9004        | 1.1 (0.897, 1.35)    | 0.3062 |
| mip1a    | 1.02 (0.779, 1.35)  | 0.8809        | 1.07 (0.833, 1.39)   | 0.6121        | 1.05 (0.777, 1.42)   | 0.7706        | 0.825 (0.314, 1.1)   | 0.6726        | 0.768 (0.357, 1.03)  | 0.3926 |
| mip1b    | 0.855 (0.645, 1.12) | 0.2608        | 0.873 (0.647, 1.17)  | 0.3636        | 0.855 (0.626, 1.17)  | 0.3211        | 0.969 (0.773, 1.05)  | 0.603         | 0.976 (0.764, 1.05)  | 0.6908 |
| scd40l   | 1.01 (0.882, 1.16)  | 0.9396        | 1.01 (0.882, 1.17)   | 0.9104        | 0.979 (0.856, 1.13)  | 0.7689        | 0.895 (0.439, 1.37)  | 0.686         | 0.919 (0.551, 1.02)  | 0.6258 |
| tgfa     | 1.12 (0.901, 1.4)   | 0.3296        | 1.16 (0.941, 1.45)   | 0.1738        | 1.16 (0.934, 1.47)   | 0.1854        | 0.891 (0.559, 1.05)  | 0.4846        | 0.949 (0.705, 1.15)  | 0.6563 |
| tnfa     | 0.907 (0.633, 1.32) | 0.599         | 1.04 (0.757, 1.46)   | 0.8345        | 0.971 (0.67, 1.43)   | 0.8783        | 0.965 (0.632, 1.21)  | 0.8027        | 0.935 (0.678, 1.1)   | 0.5358 |
| vegf     | 1.01 (0.788, 1.3)   | 0.9678        | 0.993 (0.77, 1.29)   | 0.9599        | 0.966 (0.76, 1.24)   | 0.783         | 0.83 (0.425, 1)      | 0.3828        | 0.731 (0.356, 1)     | 0.2638 |
| TGFbeta1 | 1.18 (0.797, 1.75)  | 0.4182        | 1.74 (1.19, 2.62)    | <b>0.0059</b> | 1.27 (0.829, 2.05)   | 0.3048        | 1.61 (1.13, 2.34)    | <b>0.0089</b> | 1.21 (0.8, 1.78)     | 0.3359 |

---
